# Supplementary material for: Systemically targeted cancer immunotherapy and gene delivery using transmorphic particles
Source: PubMed Central journal article supplement (PMC9358398; doi:10.15252/emmm.202115418), 2022-06-27
Supplement: EMMM-14-e15418-s004.pdf [file EMMM-14-e15418-s004.pdf]

## Expanded View Figures

**Figure EV1. Genetic maps of Transmorphic Phage/AAV, TPA and Adeno-associated Virus/Phage, AAVP.**

- A A schematic diagram of the TPA DNA encoding enhanced eGFP. TPA contains two origins of replication: pUC (high copy-number, in yellow), which enables double-stranded DNA replication in prokaryotic hosts, and f1 ori (phage origin of replication, in red), which enables single-stranded DNA replication and packaging into the phage capsid.
- B A schematic diagram of the chimeric genome of AAVP encoding eGFP. AAVP contains the full genomic sequence of filamentous bacteriophage, and a transgene cassette from AAV-2 inserted in to an intergenomic region.

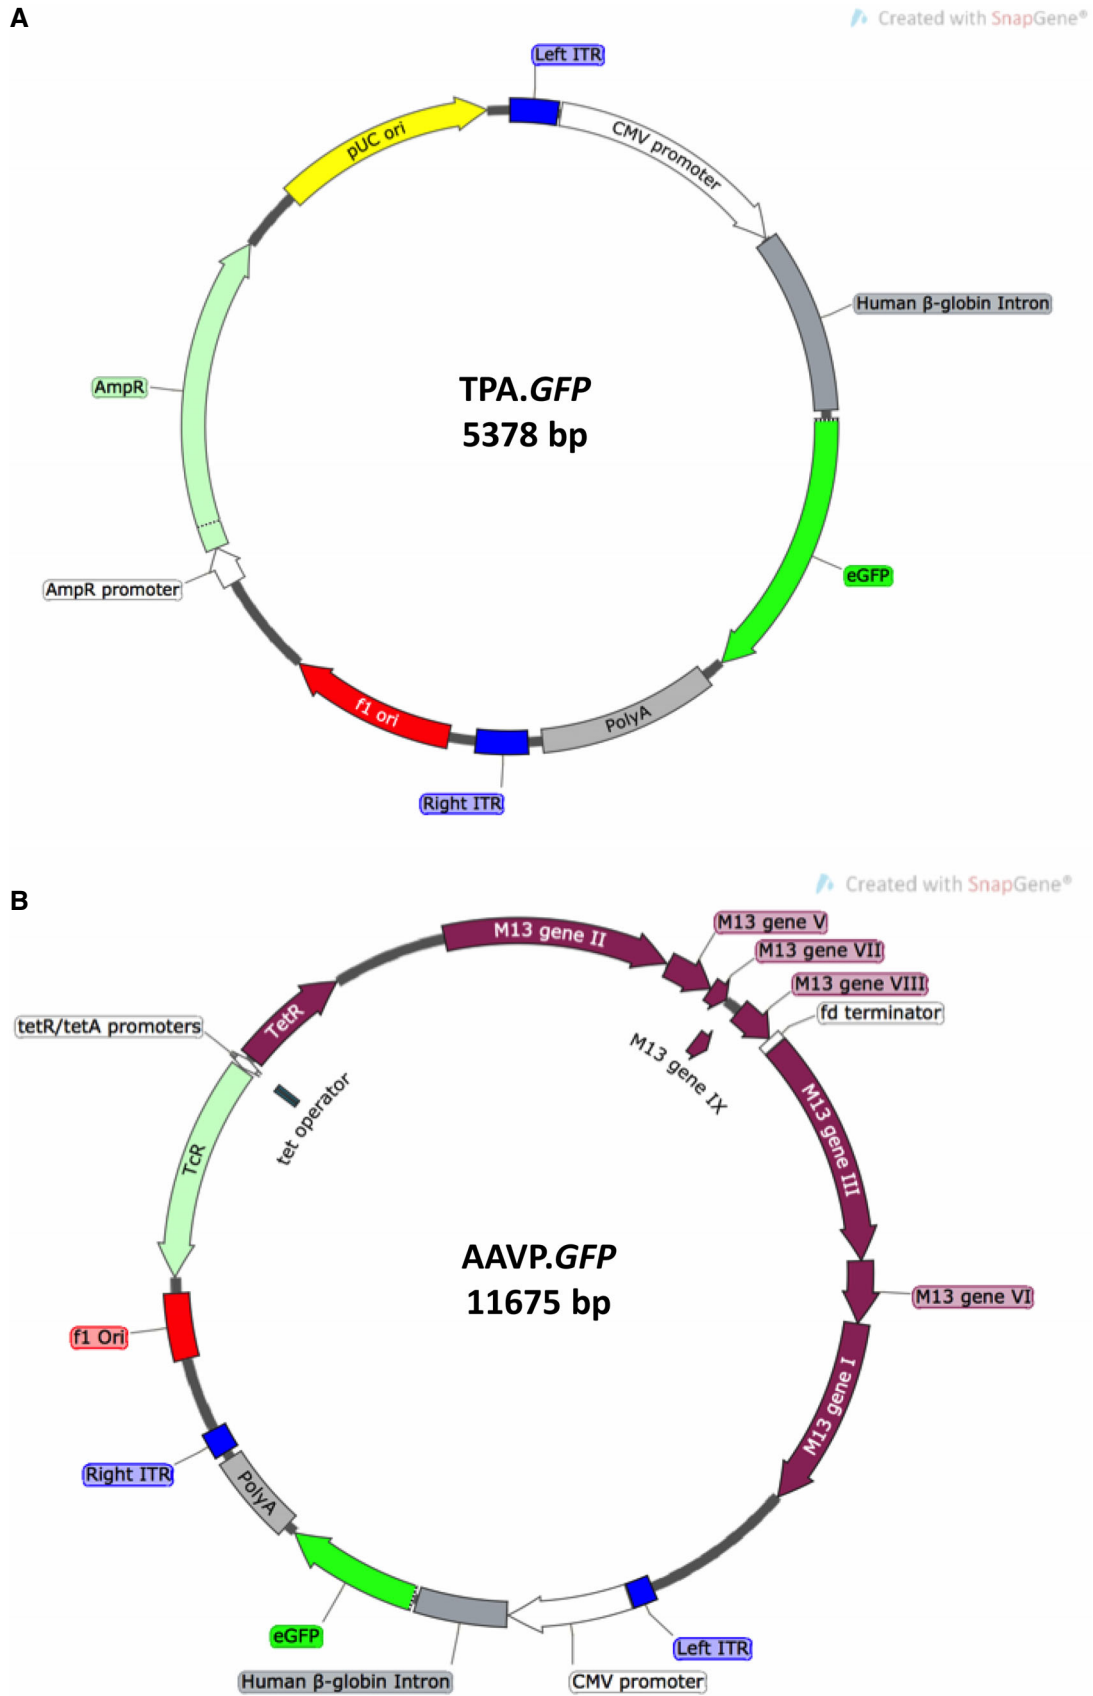

Figure EV1.

**Figure EV2. Genetic map of M13KO7 helper phage bearing the RGD4C peptide for tumour targeting.**

- A A schematic diagram of the genome of M13KO7 helper phage used for packaging the TPA DNA (shown in Fig EV1) to produce non-targeted TPA particles. The M13KO7 genome contains a medium copy-number origin of replication (p15A, in yellow).
- B A schematic diagram of the genome of RGD4C.M13KO7 helper phage used for packaging the TPA DNA (shown in Fig EV1) to produce the tumour-targeted RGD4C.TPA particles. The RGD4C coding sequence is inserted in-frame in to the M13 gene III, which encodes the pIII minor coat proteins.

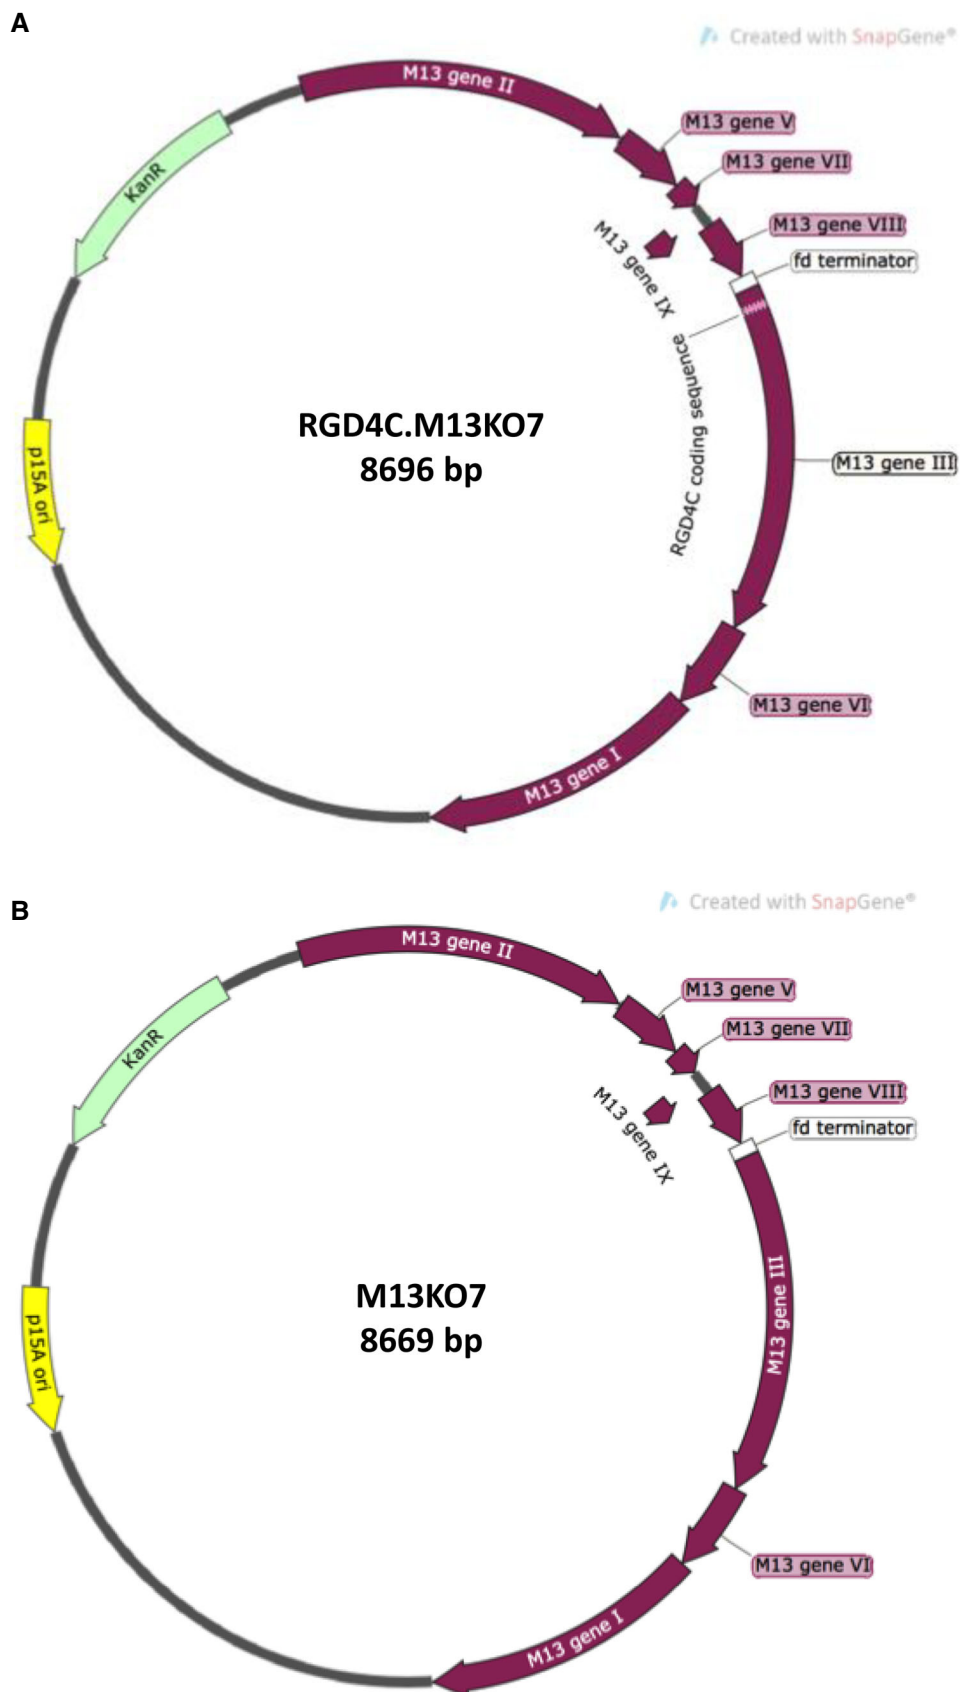

Figure EV2.

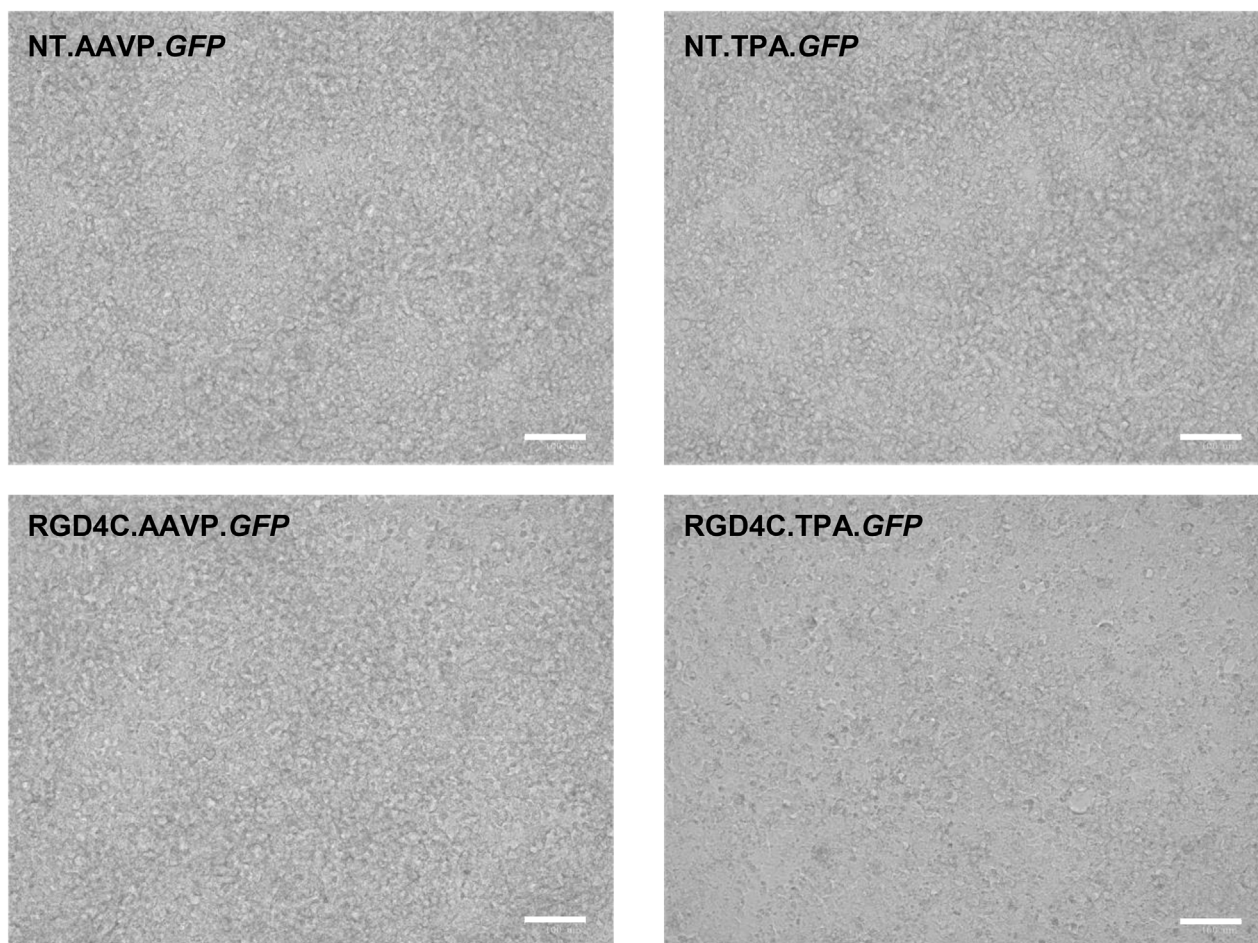

**Figure EV3. Phase contrast images of HEK293 cells treated with TPA.GFP and AAVP.GFP.**

Images of cells were obtained at day 7 post-treatment with  $1 \times 10^6$  TU/cell of either RGD4C.TPA.GFP or RGD4C.AAVP.GFP. Non-targeted (NT) vectors were included as controls. Data shown are representative of three independent experiments ( $n = 3$ ). Scale bar, 100  $\mu$ m.

Source data are available online for this figure.

**Figure EV4. TPA particle biodistribution and targeted cytokine therapy.**

A Cohorts of immunocompetent BALB/c mice with established subcutaneous tumours derived from CT26.CL25 cells ( $n = 6$  mice), were systemically administered with increasing doses  $5 \times 10^9$ ,  $1 \times 10^{10}$  and  $1 \times 10^{11}$  TU/mouse, of targeted (RGD4C) or non-targeted (NT) TPA.*IL15<sup>tgK</sup>*. *IL15<sup>tgK</sup>* gene expression was assessed by quantification of the *IL15<sup>tgK</sup>* mRNA in tumours and healthy tissues after 5 days. Data shown are representative of one experiment,  $n = 2$  technical replicates.

B Graphs showing tumour growth after targeted delivery of *IL15<sup>tgK</sup>* or *IL12*. Tumour-bearing mice injected with non-targeted (NT) TPA particles were included as controls. Data from Figs 6D and 7C were used to show the mean of total tumour luminescence from day 0 to day 5  $\pm$  SEM ( $n = 4$  mice per group).

Source data are available online for this figure.

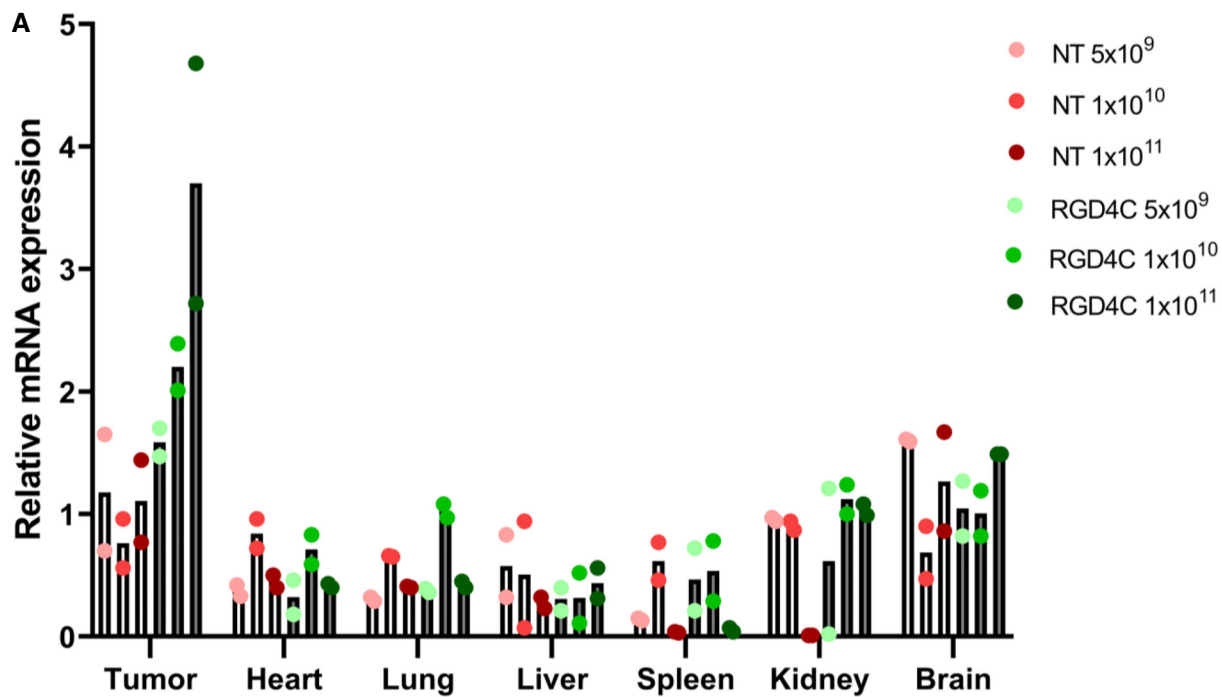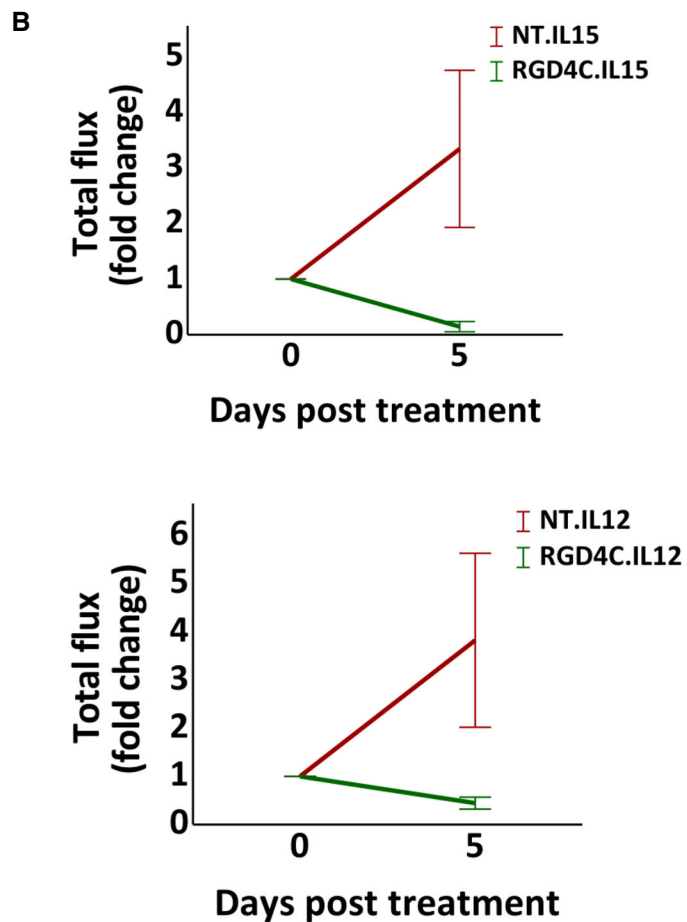

Figure EV4.

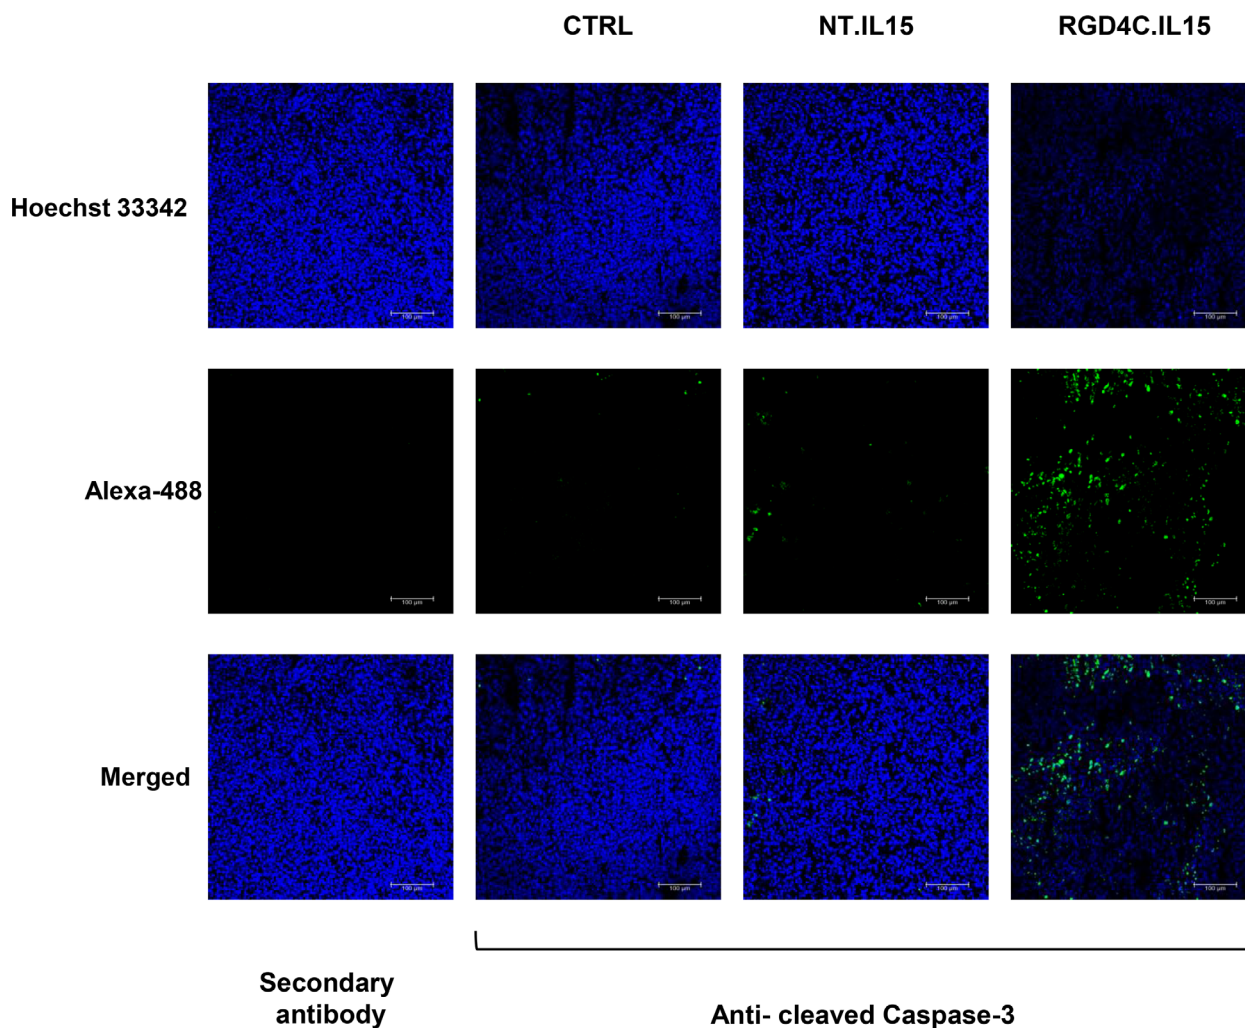

**Figure EV5. Immunostaining of tumour sections using an anti-cleaved caspase-3 antibody.**

Tumour sections from tumour-bearing mice ( $n = 6$ ) following single TPA.*IL15*<sup>tgK</sup> dose treatment,  $5 \times 10^{10}$  TU/mouse, of targeted (RGD4C.*IL15*) or non-targeted (NT.*IL15*). Untreated mice were used as controls (CTRL). Tumour sections incubated with the secondary antibody alone were also included as negative controls. Hoechst 33342 was used to stain the cell nuclei. Scale bar, 100  $\mu\text{m}$ .

Source data are available online for this figure.
